# Supplementary material for: Spectroluminescence measurements of the stability constants of CanUO2(CO3)3(4−2n)−complexes in NaClO4medium and the investigation of interaction effects
Source: Royal Society of Chemistry journal article supplement (doi:10.1039/d0dt03164j), 2020-01-01
Supplement: d0dt03164j1.pdf [file d0dt03164j1.pdf]

# Spectroluminescence measurements of stability constants of $\text{Ca}_n\text{UO}_2(\text{CO}_3)_3^{(4-2n)-}$ complexes in $\text{NaClO}_4$ medium and investigation of interaction effects.

*Chengming Shang, Pascal E. Reiller\*, and Thomas Vercouter.*

Des – Service d'Études Analytiques et de Réactivité des Surfaces (SEARS), CEA, Université Paris-Saclay, F-91191 Gif-sur-Yvette CEDEX, France.

## **Supporting Information**

This supporting information contains four Tables: the liquid junction potentials measured for  $\text{NaClO}_4$  solutions of different ionic strengths ( $0.01\text{ m} \leq I_m \leq 3.5\text{ m}$ ) using the reconditioned electrode; experimental samples information – pH value, calculated Ringböm coefficients  $\alpha$ ,  $[\text{Ca}^{2+}]$  ( $\text{mol}\cdot\text{kg}_w^{-1}$ ) and deduced  $F_0$ ; information for samples in Fig. 4; Decay-times of  $\text{Ca}_n\text{UO}_2(\text{CO}_3)_3^{(4-2n)-}$  determined at each  $I_m$ ; and two Figures: the slope analysis results of  $I_m = 3.5\text{ m}$ ; the predominance plot of the  $3.5\text{ m}$  experiment.

Table S1. Potential values  $E_{\text{mes}}$  read on pH-meter for  $\text{NaClO}_4$  solutions of  $I_m = 0.01$  to  $3.5$   $m$  at  $\text{pH} = 2$  using the reconditioned electrode of  $3.5$   $m$   $\text{NaClO}_4$  reference solution: liquid junction potentials  $\Delta E_{\text{mes}}$  calculated to estimate the potential differences between the solutions of a specific  $I_m \geq 0.1$   $m$  and of  $I_m = 0.01$   $m$ ;  $\Delta E_{\text{mes}}$  then used in the four-point calibration with commercial buffer solution of  $\text{pH}$  1.64, 4.01, 6.87, 9.18, assumed as diluted solutions of  $I_m \approx 0.01$   $m$ ; the uncertainties of  $\pm 0.05$   $\text{pH}$  in text included this non-significant experimental bias.

| Solution                                                                                                                                               | Conversion factor<br>(from molarity $M$ to<br>molality $m$ ) | $I_m$ ( $\text{mol kg}_w^{-1}$ ) | $E_{\text{mes}}$ (mV) | $\Delta E_{\text{mes}} = E_{\text{mes}} - E_{\text{mes}}$<br>( $I_m = 0.01$ $m$ ) |
|--------------------------------------------------------------------------------------------------------------------------------------------------------|--------------------------------------------------------------|----------------------------------|-----------------------|-----------------------------------------------------------------------------------|
| HCl 0.01 M<br>+ $\text{NaClO}_4$ 2.99 M                                                                                                                | 1.1678                                                       | 3.50                             | 172.2                 | 31.3                                                                              |
| HCl 0.01 M<br>+ $\text{NaClO}_4$ 2.49 M                                                                                                                | 1.1361                                                       | 2.84                             | 168                   | 27.1                                                                              |
| HCl 0.01 M<br>+ $\text{NaClO}_4$ 2.19 M                                                                                                                | 1.1196                                                       | 2.46                             | 165.5                 | 24.6                                                                              |
| HCl 0.01 M<br>+ $\text{NaClO}_4$ 1.99 M                                                                                                                | 1.1062                                                       | 2.21                             | 163.6                 | 22.7                                                                              |
| HCl 0.01 M<br>+ $\text{NaClO}_4$ 1.49 M                                                                                                                | 1.0780                                                       | 1.62                             | 158.9                 | 18                                                                                |
| HCl 0.01 M<br>+ $\text{NaClO}_4$ 0.99 M                                                                                                                | 1.0515                                                       | 1.05                             | 155.1                 | 14.2                                                                              |
| HCl 0.01 M<br>+ $\text{NaClO}_4$ 0.49 M                                                                                                                | 1.0265                                                       | 0.51                             | 150.2                 | 9.3                                                                               |
| HCl 0.01 M<br>+ $\text{NaClO}_4$ 0.19 M                                                                                                                | 1.0098                                                       | 0.20                             | 146.6                 | 5.7                                                                               |
| HCl 0.01 M<br>+ $\text{NaClO}_4$ 0.09 M                                                                                                                | 1.0075                                                       | 0.10                             | 144.5                 | 3.6                                                                               |
| HCl 0.01 M                                                                                                                                             | 1.0000                                                       | 0.01                             | 140.9                 | 0                                                                                 |
| For the solution of $I_m < 0.1$ M, the conversion factor taken as 1. The factor values for $I_m \geq 0.1$ M taken from Guillaumont et al. <sup>1</sup> |                                                              |                                  |                       |                                                                                   |

Table S2. Experimental samples information – pH value, calculated Ringböm coefficients  $\alpha$ ,  $[\text{Ca}^{2+}]$  ( $\text{mol}\cdot\text{kg}_w^{-1}$ ) and deduced  $F_0$ ; the sample solutions giving the slope of 1 are set in *italics* and those giving the slope of 2 are in **bold italics** (c.f. Fig. 2 of the main text).

| $I_m$ ( $\text{mol}\cdot\text{kg}_w^{-1}$ ) | 0.10        |              |                                                          |                 | 0.51        |              |                                                          |                 |
|---------------------------------------------|-------------|--------------|----------------------------------------------------------|-----------------|-------------|--------------|----------------------------------------------------------|-----------------|
| Sample                                      | pH value    | $\alpha$     | $[\text{Ca}^{2+}]$ ( $\text{mol}\cdot\text{kg}_w^{-1}$ ) | $F_0$ (counts)  | pH value    | $\alpha$     | $[\text{Ca}^{2+}]$ ( $\text{mol}\cdot\text{kg}_w^{-1}$ ) | $F_0$ (counts)  |
| 1                                           | 9.00        | 1.00         | 0                                                        | 1.49E+08        | 9.00        | 1.00         | 0                                                        | 2.48E+08        |
| 2                                           | 8.45        | 1.02         | 5.03E-05                                                 | 1.75E+08        | 8.13        | 1.02         | 3.44E-04                                                 | 2.10E+08        |
| 3                                           | 8.41        | 1.03         | 9.51E-05                                                 | 1.55E+08        | 7.95        | 1.09         | 8.46E-04                                                 | 1.95E+08        |
| 4                                           | 8.33        | 1.06         | 1.35E-04                                                 | 1.44E+08        | 7.90        | 1.17         | 1.06E-03                                                 | 1.95E+08        |
| 5                                           | 8.25        | 1.12         | 1.58E-04                                                 | 2.23E+08        | 7.87        | 1.24         | 1.24E-03                                                 | 2.10E+08        |
| 6                                           | 8.21        | 1.17         | 2.49E-04                                                 | 1.48E+08        | 7.84        | 1.27         | 1.59E-03                                                 | 2.05E+08        |
| 7                                           | 8.17        | 1.19         | 2.88E-04                                                 | 1.41E+08        | 7.81        | 1.38         | 2.00E-03                                                 | 2.23E+08        |
| 8                                           | 8.13        | 1.29         | 4.36E-04                                                 | 1.76E+08        | 7.78        | 1.54         | 2.39E-03                                                 | 2.24E+08        |
| 9                                           | 8.09        | 1.45         | 5.06E-04                                                 | 1.61E+08        | 7.75        | 1.73         | 2.99E-03                                                 | 2.40E+08        |
| 10                                          | 8.01        | 2.03         | 7.77E-04                                                 | 1.77E+08        | 7.72        | 2.00         | 3.86E-03                                                 | 2.36E+08        |
| 11                                          | 7.91        | 3.69         | 1.13E-03                                                 | 2.03E+08        | 7.69        | 2.36         | 4.45E-03                                                 | 2.58E+08        |
| 12                                          | 7.87        | 4.84         | 1.94E-03                                                 | 1.92E+08        | 7.66        | 2.83         | 5.20E-03                                                 | 2.72E+08        |
| 13                                          | <b>7.80</b> | <b>8.04</b>  | <b>3.08E-03</b>                                          | <b>1.98E+08</b> | 7.64        | 3.21         | 7.61E-03                                                 | 2.79E+08        |
| 14                                          | <b>7.73</b> | <b>13.67</b> | <b>5.05E-03</b>                                          | <b>2.06E+08</b> | <b>7.60</b> | <b>4.21</b>  | <b>9.97E-03</b>                                          | <b>2.97E+08</b> |
| 15                                          | <b>7.68</b> | <b>20.17</b> | <b>6.27E-03</b>                                          | <b>2.27E+08</b> | <b>7.56</b> | <b>5.59</b>  | <b>1.27E-02</b>                                          | <b>3.06E+08</b> |
| 16                                          | <b>7.62</b> | <b>32.36</b> | <b>8.69E-03</b>                                          | <b>2.33E+08</b> | <b>7.52</b> | <b>7.54</b>  | <b>1.56E-02</b>                                          | <b>3.41E+08</b> |
| 17                                          | <b>7.56</b> | <b>52.16</b> | <b>1.00E-02</b>                                          | <b>2.30E+08</b> | <b>7.48</b> | <b>10.22</b> | <b>1.69E-02</b>                                          | <b>3.63E+08</b> |
| 18                                          | <b>7.48</b> | <b>98.99</b> | <b>1.26E-02</b>                                          | <b>2.35E+08</b> | <b>7.44</b> | <b>13.97</b> | <b>2.20E-02</b>                                          | <b>3.60E+08</b> |
| 19                                          | <b>7.46</b> | <b>116.8</b> | <b>1.34E-02</b>                                          | <b>2.40E+08</b> |             |              |                                                          |                 |
| $I_m$ ( $\text{mol}\cdot\text{kg}_w^{-1}$ ) | 1.05        |              |                                                          |                 | 1.62        |              |                                                          |                 |
| Sample                                      | pH value    | $\alpha$     | $[\text{Ca}^{2+}]$ ( $\text{mol}\cdot\text{kg}_w^{-1}$ ) | $F_0$ (counts)  | pH value    | $\alpha$     | $[\text{Ca}^{2+}]$ ( $\text{mol}\cdot\text{kg}_w^{-1}$ ) | $F_0$ (counts)  |
| 1                                           | 9.00        | 1.00         | 0                                                        | 2.27E+08        | 9.00        | 1.00         | 0                                                        | 5.45E+08        |
| 2                                           | 8.13        | 1.01         | 8.81E-04                                                 | 1.71E+08        | 7.95        | 1.04         | 5.53E-04                                                 | 4.01E+08        |
| 3                                           | 7.95        | 1.04         | 1.46E-03                                                 | 1.55E+08        | 7.80        | 1.09         | 1.59E-03                                                 | 3.91E+08        |
| 4                                           | 7.80        | 1.08         | 1.94E-03                                                 | 1.54E+08        | 7.78        | 1.12         | 2.97E-03                                                 | 3.75E+08        |
| 5                                           | 7.78        | 1.11         | 2.16E-03                                                 | 1.73E+08        | 7.72        | 1.22         | 4.15E-03                                                 | 3.71E+08        |
| 6                                           | 7.72        | 1.20         | 2.70E-03                                                 | 1.69E+08        | 7.68        | 1.36         | 4.61E-03                                                 | 4.19E+08        |
| 7                                           | 7.68        | 1.32         | 3.45E-03                                                 | 1.70E+08        | 7.64        | 1.56         | 5.58E-03                                                 | 4.00E+08        |
| 8                                           | 7.64        | 1.51         | 4.32E-03                                                 | 2.33E+08        | 7.60        | 1.88         | 6.65E-03                                                 | 4.22E+08        |
| 9                                           | 7.60        | 1.80         | 5.57E-03                                                 | 2.15E+08        | 7.56        | 2.33         | 8.82E-03                                                 | 4.42E+08        |
| 10                                          | 7.56        | 2.22         | 7.77E-03                                                 | 2.35E+08        | 7.52        | 2.97         | 1.31E-02                                                 | 4.68E+08        |
| 11                                          | <b>7.52</b> | <b>2.81</b>  | <b>1.14E-02</b>                                          | <b>2.24E+08</b> | <b>7.48</b> | <b>3.86</b>  | <b>1.64E-02</b>                                          | <b>5.07E+08</b> |
| 12                                          | <b>7.48</b> | <b>3.64</b>  | <b>1.33E-02</b>                                          | <b>2.57E+08</b> | <b>7.45</b> | <b>4.79</b>  | <b>2.25E-02</b>                                          | <b>5.05E+08</b> |
| 13                                          | <b>7.45</b> | <b>4.50</b>  | <b>1.64E-02</b>                                          | <b>2.60E+08</b> | <b>7.40</b> | <b>6.95</b>  | <b>2.83E-02</b>                                          | <b>5.61E+08</b> |
| 14                                          | <b>7.40</b> | <b>6.52</b>  | <b>2.18E-02</b>                                          | <b>2.80E+08</b> | <b>7.34</b> | <b>11.08</b> | <b>3.45E-02</b>                                          | <b>6.18E+08</b> |
| 15                                          | <b>7.34</b> | <b>10.36</b> | <b>2.53E-02</b>                                          | <b>3.53E+08</b> | <b>7.32</b> | <b>15.00</b> | <b>3.73E-02</b>                                          | <b>6.13E+08</b> |
| $I_m$ ( $\text{mol}\cdot\text{kg}_w^{-1}$ ) | 2.21        |              |                                                          |                 | 2.46        |              |                                                          |                 |
| Sample                                      | pH value    | $\alpha$     | $[\text{Ca}^{2+}]$ ( $\text{mol}\cdot\text{kg}_w^{-1}$ ) | $F_0$ (counts)  | pH value    | $\alpha$     | $[\text{Ca}^{2+}]$ ( $\text{mol}\cdot\text{kg}_w^{-1}$ ) | $F_0$ (counts)  |
| 1                                           | 9.06        | 1.00         | 0                                                        | 3.02E+08        | 8.80        | 1.00         | 0                                                        | 4.77E+08        |
| 2                                           | 7.85        | 1.02         | 3.72E-03                                                 | 2.81E+08        | 8.13        | 1.00         | 2.45E-03                                                 | 4.61E+08        |
| 3                                           | 7.82        | 1.05         | 7.07E-03                                                 | 3.14E+08        | 7.95        | 1.01         | 3.93E-03                                                 | 4.34E+08        |
| 4                                           | 7.79        | 1.05         | 7.80E-03                                                 | 3.37E+08        | 7.80        | 1.02         | 4.99E-03                                                 | 4.30E+08        |
| 5                                           | 7.73        | 1.07         | 8.77E-03                                                 | 3.53E+08        | 7.58        | 1.17         | 6.20E-03                                                 | 3.96E+08        |
| 6                                           | 7.68        | 1.11         | 9.67E-03                                                 | 3.98E+08        | 7.54        | 1.28         | 7.74E-03                                                 | 3.91E+08        |
| 7                                           | 7.62        | 1.19         | 1.16E-02                                                 | 4.40E+08        | 7.50        | 1.45         | 9.51E-03                                                 | 4.47E+08        |
| 8                                           | 7.58        | 1.24         | 1.51E-02                                                 | 4.42E+08        | 7.46        | 1.69         | 1.13E-02                                                 | 4.17E+08        |
| 9                                           | 7.50        | 1.60         | 1.68E-02                                                 | 4.28E+08        | 7.42        | 2.06         | 1.27E-02                                                 | 4.06E+08        |
| 10                                          | <b>7.48</b> | <b>1.75</b>  | <b>2.11E-02</b>                                          | <b>4.16E+08</b> | 7.38        | 2.60         | 1.72E-02                                                 | 4.65E+08        |
| 11                                          | <b>7.42</b> | <b>2.38</b>  | <b>2.89E-02</b>                                          | <b>4.41E+08</b> | 7.34        | 3.34         | 2.01E-02                                                 | 5.22E+08        |
| 12                                          | <b>7.35</b> | <b>3.71</b>  | <b>3.27E-02</b>                                          | <b>4.59E+08</b> | <b>7.30</b> | <b>4.42</b>  | <b>2.63E-02</b>                                          | <b>5.52E+08</b> |
| 13                                          | <b>7.30</b> | <b>5.29</b>  | <b>4.24E-02</b>                                          | <b>5.05E+08</b> | <b>7.27</b> | <b>5.50</b>  | <b>3.46E-02</b>                                          | <b>5.75E+08</b> |
| 14                                          | <b>7.22</b> | <b>9.62</b>  | <b>5.54E-02</b>                                          | <b>5.56E+08</b> | <b>7.22</b> | <b>7.97</b>  | <b>4.13E-02</b>                                          | <b>6.82E+08</b> |
|                                             |             |              |                                                          |                 | <b>7.18</b> | <b>10.85</b> | <b>5.01E-02</b>                                          | <b>7.59E+08</b> |

Table S2 (continued).

| $I_m$ (mol·kg <sub>w</sub> <sup>-1</sup> ) | 3.50     |          |                                                          |                         |  |  |  |  |
|--------------------------------------------|----------|----------|----------------------------------------------------------|-------------------------|--|--|--|--|
| Sample                                     | pH value | $\alpha$ | [Ca <sup>2+</sup> ] (mol·kg <sub>w</sub> <sup>-1</sup> ) | F <sub>0</sub> (counts) |  |  |  |  |
| 1                                          | 8.94     | 1.00     | 0.00001                                                  | 1.28E+08                |  |  |  |  |
| 2                                          | 8.30     | 1.01     | 0.00097                                                  | 2.39E+08                |  |  |  |  |
| 3                                          | 8.10     | 1.03     | 0.00306                                                  | 3.87E+08                |  |  |  |  |
| 4                                          | 7.90     | 1.03     | 0.00719                                                  | 1.92E+08                |  |  |  |  |
| 5                                          | 7.70     | 1.06     | 0.01769                                                  | 2.28E+08                |  |  |  |  |
| 6                                          | 7.60     | 1.11     | 0.02156                                                  | 1.86E+08                |  |  |  |  |
| 7                                          | 7.50     | 1.29     | 0.02623                                                  | 2.04E+08                |  |  |  |  |
| 8                                          | 7.44     | 1.49     | 0.03109                                                  | 2.08E+08                |  |  |  |  |
| 9                                          | 7.39     | 1.85     | 0.04189                                                  | 2.18E+08                |  |  |  |  |
| 10                                         | 7.33     | 2.58     | 0.05419                                                  | 2.27E+08                |  |  |  |  |
| 11                                         | 7.29     | 3.33     | 0.06825                                                  | 2.07E+08                |  |  |  |  |
| 12                                         | 7.27     | 3.84     | 0.09060                                                  | 2.48E+08                |  |  |  |  |
| 13                                         | 7.25     | 4.44     | 0.14429                                                  | 2.79E+08                |  |  |  |  |
| 14                                         | 7.22     | 5.56     | 0.21003                                                  | 3.31E+08                |  |  |  |  |
| 15                                         | 7.20     | 6.51     | 0.25634                                                  | 3.57E+08                |  |  |  |  |
| 16                                         | 7.17     | 8.23     | 0.32939                                                  | 3.88E+08                |  |  |  |  |
| 17                                         | 7.16     | 9.00     | 0.39816                                                  | 4.09E+08                |  |  |  |  |
| 18                                         | 7.15     | 9.85     | 0.50482                                                  | 4.05E+08                |  |  |  |  |

Table S3. Information for samples in Fig. 4 of the main text.

| Sample                                                   | 0.1 m NaCl | 0.1 m NaClO <sub>4</sub> | 1 m NaCl | 1 m NaClO <sub>4</sub> |
|----------------------------------------------------------|------------|--------------------------|----------|------------------------|
| pH value                                                 | 7.82       | 7.78                     | 7.43     | 7.56                   |
| [Ca <sup>2+</sup> ] (mol kg <sub>w</sub> <sup>-1</sup> ) | 5.98E-3    | 5.19E-3                  | 7.80E-2  | 2.80E-2                |

Table S4 Decay-times of  $\text{Ca}_n\text{UO}_2(\text{CO}_3)_3^{(4-2n)-}$  determined at each  $I_m$ .

| $I_m$ ( $\text{mol}\cdot\text{kg}_w^{-1}$ ) | $\tau$ ( $\text{UO}_2(\text{CO}_3)_3^{4-}$ ) (ns)               | $\tau$ ( $\text{CaUO}_2(\text{CO}_3)_3^{2-}$ ) (ns)               | $\tau$ ( $\text{Ca}_2\text{UO}_2(\text{CO}_3)_3(\text{aq})$ ) (ns) |
|---------------------------------------------|-----------------------------------------------------------------|-------------------------------------------------------------------|--------------------------------------------------------------------|
| 0.10                                        | $10.62 \pm 0.22$                                                | $30.41 \pm 1.9$                                                   | $51.19 \pm 1.85$                                                   |
| 0.51                                        | $8.46 \pm 0.17$                                                 | $39.79 \pm 2.78$                                                  | $68.53 \pm 4.45$                                                   |
| 1.05                                        | $9.51 \pm 0.11$                                                 | $37.57 \pm 4.77$                                                  | $63.02 \pm 4.45$                                                   |
| 1.62                                        | $9.39 \pm 0.13$                                                 | $35.52 \pm 2.66$                                                  | $65.76 \pm 6.35$                                                   |
| 2.21                                        | $11.21 \pm 0.40$                                                | $27.72 \pm 1.34$                                                  | $47.54 \pm 2.53$                                                   |
| 2.46                                        | $10.61 \pm 0.12$                                                | $38.6 \pm 4.33$                                                   | $86.36 \pm 10.15$                                                  |
| Averaged $\tau$                             | $10.0 \pm 1.0$ ( $\tau$ measured from $I_m = 0.1$ to 2.46 $m$ ) | $34.20 \pm 2.24$ ( $\tau$ measured from $I_m = 0.1$ to 2.21 $m$ ) | $59.21 \pm 4.15$ ( $\tau$ measured from $I_m = 0.1$ to 2.21 $m$ )  |

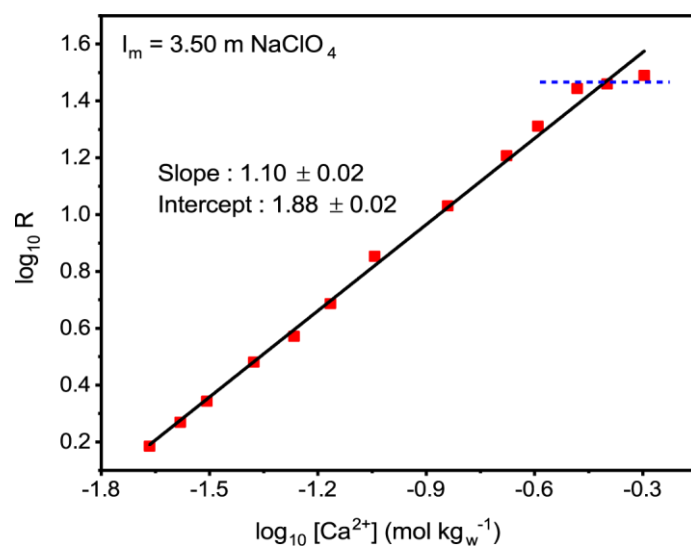

Fig. S1. Plot of logarithmic ratio  $R$  as a function of  $\log_{10}[\text{Ca}^{2+}]$  ( $\text{mol kg}_w^{-1}$ ) at  $I_m = 3.50 \text{ m}$  of  $\text{NaClO}_4$  medium:  $[\text{U}]_{\text{total}} = 50 \mu\text{mol kg}_w^{-1}$ ,  $P(\text{CO}_2) = 10^{-3.5} \text{ atm}$ .

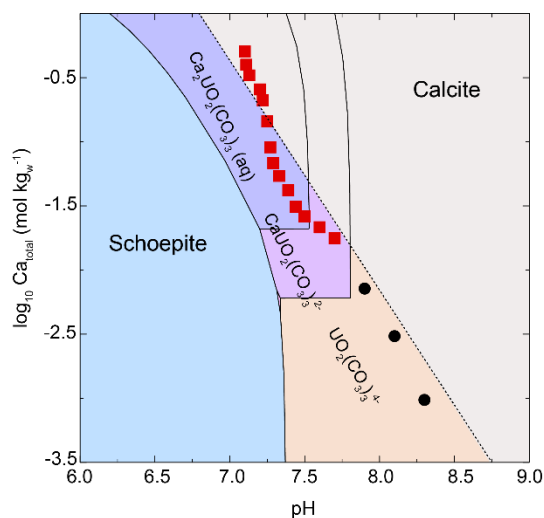

Fig. S2. Predominance plot obtained using PHREEPLOT<sup>2</sup> of Ca-UO<sub>2</sub>-CO<sub>3</sub> system at [U(VI)] = 50 μm, P(CO<sub>2</sub>) = 10<sup>-3.5</sup> atm at I<sub>m</sub> = 3.50 m NaClO<sub>4</sub>: experimental points giving slopes of one are highlighted with red squares; the black circles represent the beginning of titration where the binary complex dominates; dotted line represent the predominance line between Ca<sup>2+</sup> and calcite.

## References

1. R. Guillaumont, T. Fanghänel, V. Neck, J. Fuger, D. A. Palmer, I. Grenthe and M. H. Rand, *Update of the Chemical Thermodynamics of Uranium, Neptunium, Plutonium, Americium and Technetium*, OECD Nuclear Energy Agency, Data Bank, Issy-les-Moulineaux, France, 2003.
2. D. G. Kinniburgh and D. M. Cooper, *Creating Graphical Output with PHREEQC*, 2011. <http://www.phreeplot.org>
